# Supplementary material
Source: PubMed Central journal article supplement (PMC4293767)
Supplement: DS_10.1177_0022034514550717.pdf [file DS_10.1177_0022034514550717.pdf]

R.M. Santamaria<sup>1\*</sup>, N.P.T. Innes<sup>2</sup>,  
V. Machiulskiene<sup>3</sup>, D.J.P. Evans<sup>2</sup>, and C.H. Splieth<sup>1</sup>

<sup>1</sup>Department of Preventive and Paediatric Dentistry, Ernst-Moritz-Arndt University of Greifswald, Greifswald, Germany; <sup>2</sup>The Division of Oral Health Science, School of Dentistry, University of Dundee, Dundee, Scotland, UK; and <sup>3</sup>Clinic of Dental and Oral Pathology, Faculty of Odontology, Lithuanian University of Health Sciences, Kaunas, Lithuania; \*corresponding author, ruth.santamaria@uni-greifswald.de

*J Dent Res* DOI: 10.1177/0022034514550717

## APPENDIX

### METHODS

#### Training of Treating Dentists

Training consisted of discussion of the study protocol and a “hands-on” training session for the nonrestorative caries treatment and the Hall technique; a training video on the Hall technique was simultaneously used. For conventional restorations, postgraduate paediatric students spent between three and four “hands-on” training sessions as part of their postgraduate training with the paediatric specialist teachers.

#### Study Teeth

The International Caries Detection and Assessment System (ICDAS) was used for caries assessment; only teeth classified as ICDAS, codes 3 (localized enamel breakdown); code 4 (underlying dentin shadow); and code 5 (distinct cavity with visible dentin) were included ([www.icdas.org/what-is-icdas](http://www.icdas.org/what-is-icdas)).

#### Follow-up Assessment, Criteria, and Examiners

The criteria used for the follow-up assessment were all standard clinical outcomes (apart from ICDAS) used in daily

# Caries Management Strategies for Primary Molars: 1-Yr Randomized Control Trial Results

practice. Examiners calibrated through discussion of cases and by agreeing on assessment criteria. Success or failure of treatments was assessed according to specific criteria previously developed and used for this purpose (Innes *et al.*, 2007). Additionally, to assess nonrestorative caries treatment cases, the ICDAS Caries Lesion Activity Assessment criteria were used (Nyvad *et al.*, 1999; Ekstrand *et al.*, 2009). Overall, Minor Failures included all reversible conditions, where affected teeth could be treated, preserving the pulp vitality. Major Failures include all irreversible conditions, requiring pulp treatment or extraction.

## APPENDIX REFERENCES

- Ekstrand KR, Zero DT, Martignon S, Pitts NB (2009). Lesion activity assessment. *Monogr Oral Sci* 21:63-90.
- Innes NP, Evans DJ, Stirrups DR (2007). The Hall technique: a randomized controlled clinical trial of a novel method of managing carious primary molars in general dental practice. Acceptability of the technique and outcomes at 23 months. *BMC Oral Health* 7:18.
- Nyvad B, Machiulskiene V, Baelum V (1999). Reliability of a new caries diagnostic system differentiating between active and inactive caries lesions. *Caries Res* 33:252-260.
